# Supplementary material for: Land-Use and Land Cover Is Driving Factor of Runoff Yield: Evidence from A Remote Sensing-Based Runoff Generation Simulation
Source: MDPI journal article supplement (doi:10.3390/w14182854), 2022-09-13
Supplement: s1 [file s1]

Archive with 1 entries (1 files):
- water-1846850-supplementary conversion.pdf
